# Supplementary material for: Glyphosate induces benign monoclonal gammopathy and promotes multiple myeloma progression in mice
Source: Springer Nature journal article supplement (doi:10.1186/s13045-019-0767-9), 2019-07-05
Supplement: MOESM2 [file 16901066]

**Supplemental Table 1 Summary of rodent studies of glyphosate and cancer incidence**

| <b>Animal (No. per group) *</b>             | <b>Treatment **</b>                                   | <b>Duration</b>            | <b>Results ***</b>                                                                                                                                                |
|---------------------------------------------|-------------------------------------------------------|----------------------------|-------------------------------------------------------------------------------------------------------------------------------------------------------------------|
| <b>CD-1 mice (n =50 M and 50 F)</b>         | Diet, 0, 1,000, 5,000, or 30,000 ppm                  | 24 months                  | Renal tubule adenoma or carcinoma (6% for the 30,000 ppm M group <sup>Δ</sup> )                                                                                   |
| <b>CD-1 mice (n =50 M and 50 F)</b>         | Diet, 0, 100, 300, or 1,000 ppm                       | 24 months                  | Hemangiosarcoma (8% for the 1,000 ppm M group <sup>Δ</sup> )                                                                                                      |
| <b>S-D rats (n =10 M and 10 F)</b>          | Water, 0, 5.0 x 10 <sup>-5</sup> , 400, or 2,250 mg/L | 24 months                  | Mammary tumors ( <u>100%</u> in the <u>400 mg/L</u> F group <sup>Δ</sup> , 50, 90, and <u>90%</u> for 0, 5.0 x 10 <sup>-5</sup> , and <u>2,250 mg/L</u> F groups) |
| <b>S-D rats (n =60 M and 60 F)</b>          | Diet, 0, 2,000, 8,000, or 20,000 ppm                  | 24 months                  | Pancreas islet cell adenoma ( <u>14%</u> in the <u>2,000 ppm</u> M group <sup>Δ</sup> , 2, 8, and <u>12%</u> for 0, 8,000, and <u>20,000 ppm</u> M groups).       |
| <b>S-D rats (n =50 M and 50 F)</b>          | Diet, 0, 30, 100, or 300 ppm                          | Life-time, up to 26 months | Pancreas islet cell adenoma ( <u>10%</u> in the <u>30 ppm</u> M group <sup>Δ</sup> , 0, 4, and <u>4%</u> for 0, 100, and <u>300 ppm</u> M groups).                |
| <b>Wistar rats (n =50 M and 50 F)</b>       | Water, 0, 300, 900, or 2,700 mg/L                     | 24 months                  | NS                                                                                                                                                                |
| <b>S-D rats (n =50 M and 50 F)</b>          | Diet, 0, 10, 100, 300, or 1,000 mg/kg bw              | 24 months                  | NS                                                                                                                                                                |
| <b>Wistar-Alpk:ApfSD (n =52 M and 52 F)</b> | Diet, 0, 2,000, 6,000, or 20,000 ppm                  | 24 months                  | NS                                                                                                                                                                |
| <b>Wistar-Alpk:ApfSD (n =24 M and 24 F)</b> | Diet, 0, 2,000, 8,000, or 20,000 ppm                  | 12 months                  | NS                                                                                                                                                                |

\* M, male; F, female. S-D, Sprague-Dawley

\*\* All treatments were *ad libitum*

\*\*\* Only tumors with a statistically significant result are shown with the dosage and % underlined (<sup>Δ</sup>, P ≤ 0.05 compared to the no glyphosate group; bold and underlined denotes no further increase in incidence at highest doses). NS, not significant increase.
